# Supplementary material for: Genome-Wide Atlas of Promoter Expression Reveals Contribution of Transcribed Regulatory Elements to Genetic Control of Disuse-Mediated Atrophy of Skeletal Muscle
Source: MDPI journal article supplement (doi:10.3390/biology10060557), 2021-06-20
Supplement: s1 [file s1]

## Supplementary description

### Morphometric analysis

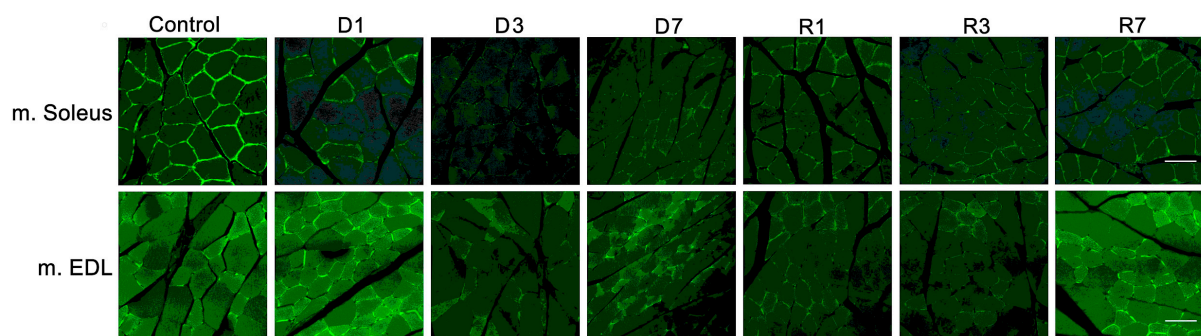

(See SF3 for full figure)

Images of m. Soleus and m. EDL cross-sections from control and experimental groups, stained by primary antibodies to dystrophin and secondary antibodies (donkey IgG anti-rabbit) conjugated to Alexa488 fluorochrome and obtained using a Leica TCS SP5 MP confocal scanning microscope. Scale: 50  $\mu$ m.

### Gene expression shifts associated with atrophy

All identified DPI1 peaks covered 17507 genes in EDL and 18599 genes. Permissive threshold (maximum CTSS count at least 3) decreased the gene coverage down to about 40% and the robust threshold (maximum CTSS count at least 11 and TPM normalization score at least 1) left roughly

a quarter of those genes covered. In our work we mostly relied on permissive threshold filtered peaks as TSS.

| Threshold    | soleus muscle    |               | EDL muscle       |               |
|--------------|------------------|---------------|------------------|---------------|
|              | peaks identified | genes covered | peaks identified | genes covered |
| No threshold | 596908           | 18559         | 470041           | 17507         |
| Robust       | 40632            | 7740          | 34196            | 6930          |
| Permissive   | 170875           | 13337         | 126855           | 11915         |

Table SD1. DPI peaks identified in CTSS of EDL and SOL muscle cell

### Comparison with FANTOM5

We have compared revealed TSSs in the above 2 muscle types with TSSs in the slow (soleus) and fast (EDL) rat muscle tissues described in FANTOM5. The results are shown in table SD2.

Generally, we have revealed more TSSs for each muscle type than in FANTOM5, however they are related with smaller numbers of genes. Bigger number of TSSs can be explained by deeper coverage in our experiment compared to FANTOM5 data on rat tissues (See ST2). Smaller number of genes can be explained that FANTOM 5 covers more tissue types (aortic smooth muscle, hepatocytes, mesenchymal stem cells, universal RNA samples) while in our experiment we have

specifically investigated only skeletal muscles. However due to deeper coverage and different physiological influences (disuse atrophy and recovery) we have revealed a lot of new TSSs both for genes already described in FANTOM5 and unique for the experiment.

Further analysis of revealed TSSs allowed us to group some of them into enhancers, so this experiment provides a new set of enhancers functioning in 2 types of skeletal muscles in different physiological conditions.

Thus results of the experiment significantly extend our knowledge about TSSs and enhancers functioning in rat skeletal muscles in different physiological conditions. To make it publicly available we put them into the GTRD database as described below.

|           | FANTOM5 | Revealed in experiment |                     |        |               |
|-----------|---------|------------------------|---------------------|--------|---------------|
|           |         | Total                  | Common with Fantom5 | Unique | Muscle type   |
| TSS       | 28 497  | 40 632                 | 15 174              | 25 458 | Soleus        |
|           |         | 34 196                 | 13 705              | 20 491 | EDL           |
| Enhancers | NA      | 1 846                  |                     | 1 846  | Soleus        |
|           |         | 1 312                  |                     | 1 312  | EDL           |
| Promoters |         |                        |                     |        | Soleus<br>EDL |
| Genes     | 8 351*  | 7 796                  | 5 708               | 2 088  | Soleus        |
|           |         | 6 987                  | 5 305               | 1 682  | EDL           |

Table SD2. Comparison of revealed rat TSSs with FANTOM 5

\*Data obtained by intersecting FANTOM5 peaks with gene coordinates from Ensembl v99

### Integration with FANTOM5 data

From a user view point it will be more convenient when obtained data will be integrated with FANTOM5 data. Main ideas are following:

- to build merged set of TSSs from FANTOM5 and obtained data;
- when TSSs are overlapping in FANTOM5 and obtained data, then maximally preserve FANTOM5 TSSs and in rare cases add new TSSs. This is the most sophisticated part. See its description below.
- using the joined set of TSSs to build the joined table of TSSs expressions using FANTOM5 and new data. For this purpose we are recalculating TSSs expressions using their joined set. Due to the suggested approach all FANTOM5 data will be preserved and seamlessly extended by the new data.
- annotate new TSSs using the same approach as FANTOM5. All FANTOM5 data also will be preserved and seamlessly extended by the new data.
- while FANTOM5 does not provide enhancers and their annotation for CAGE-seq data for rat, we are building a set of enhancers using both FANTOM5 and our data.
- to provide a unique ID for each TSS, enhancer and promoter so a user can unambiguously refer to them.

The suggested approach is used for incremental integration of other CAGE-seq data with FANTOM5 data. It was implemented as a new pipeline for the GTRD database that provides uniform annotation and analysis of wide range of NGS data related to gene expression regulation (Kolmykov et al., 2021; doi: 10.1093/nar/gkaa1057)

GTRD web interface for CAGE-seq data

Experiments: Brief - gtrd

gtrd.biouml.org/#table/gtrd\_current.experiments/Brief

Main Experiments Cells TF & cofactors Downloads TSS Enhancers Statistics Log

Species:  Type:  Cells:  GEO:

### Experiments: Brief

Other columns:

| #  | ID                         | Type     | Species           | Cell type                  | Treatment                                      | Design | TF class | Uniprot |
|----|----------------------------|----------|-------------------|----------------------------|------------------------------------------------|--------|----------|---------|
| 1  | <a href="#">CEXP000001</a> | CAGE-seq | Rattus norvegicus | <a href="#">EDL muscle</a> | Label:Control; AnimalID:U6; Lane:1; Index:CAC; |        |          |         |
| 2  | <a href="#">CEXP000002</a> | CAGE-seq | Rattus norvegicus | <a href="#">EDL muscle</a> | Label:Control; AnimalID:U7; Lane:1; Index:GCG; |        |          |         |
| 3  | <a href="#">CEXP000003</a> | CAGE-seq | Rattus norvegicus | <a href="#">EDL muscle</a> | Label:Control; AnimalID:U8; Lane:1; Index:TAC; |        |          |         |
| 4  | <a href="#">CEXP000004</a> | CAGE-seq | Rattus norvegicus | <a href="#">EDL muscle</a> | Label:H24h; AnimalID:U26; Lane:2; Index:GCG;   |        |          |         |
| 5  | <a href="#">CEXP000005</a> | CAGE-seq | Rattus norvegicus | <a href="#">EDL muscle</a> | Label:H24h; AnimalID:U24; Lane:6; Index:ACC;   |        |          |         |
| 6  | <a href="#">CEXP000006</a> | CAGE-seq | Rattus norvegicus | <a href="#">EDL muscle</a> | Label:H24h; AnimalID:U25; Lane:2; Index:CAC;   |        |          |         |
| 7  | <a href="#">CEXP000007</a> | CAGE-seq | Rattus norvegicus | <a href="#">EDL muscle</a> | Label:H3; AnimalID:U9; Lane:2; Index:TAC;      |        |          |         |
| 8  | <a href="#">CEXP000008</a> | CAGE-seq | Rattus norvegicus | <a href="#">EDL muscle</a> | Label:H3; AnimalID:U11; Lane:3; Index:CAC;     |        |          |         |
| 9  | <a href="#">CEXP000009</a> | CAGE-seq | Rattus norvegicus | <a href="#">EDL muscle</a> | Label:H3; AnimalID:U10; Lane:6; Index:CAC;     |        |          |         |
| 10 | <a href="#">CEXP000010</a> | CAGE-seq | Rattus norvegicus | <a href="#">EDL muscle</a> | Label:H7; AnimalID:U1; Lane:3; Index:GCG;      |        |          |         |

Previous **1** 2 3 4 5 6 Next 10 entries Showing 1 to 10 of 55 entries

Back

Experiment: CEXP000010, CAGE-seq

gtrd.biouml.org/#table/gtrd\_current.experiments/Details/ID=CEXP000010

Main Experiments Cells TF & cofactors Downloads TSS Enhancers Statistics Login

### Experiment CEXP000010, CAGE-seq

Species: [Rattus norvegicus](#)  
 Cell type: [EDL muscle](#)  
 Treatment: [Label:H7; AnimalID:U1; Lane:3; Index:GCG;](#)

#### References

#### Files

| Accession | Data type                | Peak caller | Assembly | # elements | File size | Format | Download                                       | Genome browser       |
|-----------|--------------------------|-------------|----------|------------|-----------|--------|------------------------------------------------|----------------------|
|           | Alignment                |             | rn6      |            | 13.2MB    | bigWig | <a href="#">CEXP000010_cell_id_5264.bigWig</a> | <a href="#">UCSC</a> |
|           | CageProfileForwardStrand |             | rn6      |            | 4.27MB    | bigWig | <a href="#">CEXP000010_f.bw</a>                | <a href="#">UCSC</a> |
|           | CageProfileReverseStrand |             | rn6      |            | 4.36MB    | bigWig | <a href="#">CEXP000010_r.bw</a>                | <a href="#">UCSC</a> |

Figure SD1. List of CAGE-seq experiments (A) and detailed description of selected CAGE-seq experiment (B).

TSS: Transcription start sites - gtrd

gtrd.biouml.org/#table/gtrd\_current.cage\_peaks\_/Transcription%20start%20sites/genome=mn6

Main Experiments Cells TF & cofactors Downloads TSS Enhancers Statistics Login

Species: Rattus norvegicus Type: Select ... Location: Select ...  
Gene: Source: Select ... FANTOM5/refTSS id: Submit

### TSS: Transcription start sites

Other columns: Select...

| #  | ID      | Chromosome | Start   | End     | Strand | TSS     | Type     | Gene  | Enhancer | FANTOM5 id              | Source  | Version |
|----|---------|------------|---------|---------|--------|---------|----------|-------|----------|-------------------------|---------|---------|
| 71 | 3813981 | chr1       | 5448894 | 5448906 | +      | 5448900 | promoter | Epm2a |          |                         | SOL+EDL | 1       |
| 72 | 3813982 | chr1       | 5448913 | 5448923 | +      | 5448918 | promoter | Epm2a |          |                         | SOL+EDL | 1       |
| 73 | 3813983 | chr1       | 5448926 | 5448946 | +      | 5448931 | promoter | Epm2a |          |                         | SOL+EDL | 1       |
| 74 | 3829679 | chr1       | 5572220 | 5572221 | +      | 5572220 |          |       |          |                         | SOL+EDL | 1       |
| 75 | 3829680 | chr1       | 6355879 | 6355882 | -      | 6355880 |          |       |          |                         | SOL+EDL | 1       |
| 76 | 3814993 | chr1       | 6917688 | 6917711 | -      | 6917705 |          |       |          |                         | SOL+EDL | 1       |
| 77 | 2961305 | chr1       | 6930892 | 6930897 | -      | 6930896 |          |       |          | chr1:6930891..6930897,- | FANTOM5 | 1       |
| 78 | 2961306 | chr1       | 6969392 | 6969404 | -      | 6969400 |          |       |          | chr1:6969391..6969404,- | FANTOM5 | 1       |
| 79 | 3814995 | chr1       | 6969398 | 6969400 | -      | 6969399 |          |       |          | chr1:6969391..6969400   | SOL+EDL | 1       |
| 80 | 2961307 | chr1       | 7064881 | 7064887 | -      | 7064883 | promoter | Stx11 |          | chr1:7064880..7064887,- | FANTOM5 | 1       |

Previous 1 ... 7 8 9 ... 6264 Next 10 entries Showing 71 to 80 of 62.638 entries

Back

Figure SD2. Joined list of rat TSS in GTRD database.

TSS: 2961307 - promoter - gtrd

gtrd.biouml.org/#table/gtrd\_current.cage\_peaks\_/Details/genome=mn6/id=2961307

Main Experiments Cells TF & cofactors Downloads TSS Enhancers Statistics Login

### TSS: 2961307 - promoter

Species: Rattus norvegicus  
Location: chr1: 7 064 881 - 7 064 887 (-)  
Summit: 7 064 883

Gene symbol: Stx11

Source: FANTOM5  
Name: chr1:7064880..7064887,-  
FANTOM5: chr1:7064880..7064887,-  
Version: 1

Annotation Transcripts Expression

| #  | Cell type   | Treatment                                                                                      | Value | Genome browser |
|----|-------------|------------------------------------------------------------------------------------------------|-------|----------------|
| 1  |             | SampleName: Rat Mesenchymal stem cells - bone marrow derived, donor1; ExtractName: 11296-117A9 | 3     | UCSC           |
| 2  |             | SampleName: Rat Aortic Smooth Muscle cells, donor2; ExtractName: 11377-118A9                   | 12    | UCSC           |
| 3  |             | SampleName: Rat Aortic Smooth Muscle cells, donor1; ExtractName: 11300-117B4                   | 18    | UCSC           |
| 4  |             | SampleName: Universal RNA - Rat Normal Tissues Biochain, pool1; ExtractName: 10009-101B8       | 7     | UCSC           |
| 5  | hepatocytes | SampleName: Rat hepatocytes, donor3; ExtractName: 11444-118I4                                  | 0     | UCSC           |
| 6  |             | SampleName: Rat Mesenchymal stem cells - bone marrow derived, donor3; ExtractName: 11445-118I5 | 10    | UCSC           |
| 7  |             | SampleName: Rat Aortic Smooth Muscle cells, donor3; ExtractName: 11449-118I9                   | 8     | UCSC           |
| 8  |             | SampleName: Rat Aortic Smooth Muscle cells - differentiated, donor1; ExtractName: 11481-119D5  | 10    | UCSC           |
| 9  |             | SampleName: Rat Aortic Smooth Muscle cells - differentiated, donor2; ExtractName: 11482-119D6  | 15    | UCSC           |
| 10 |             | SampleName: Rat Aortic Smooth Muscle cells - differentiated, donor3; ExtractName: 11483-119D7  | 5     | UCSC           |

Previous 1 2 Next 10 entries Showing 1 to 10 of 13 entries

Back

Figure SD3. Detailed description of selected rat promoter in GTRD database.



Enhancers: List - gtrd

gtrd.biouml.org/#table/gtrd\_current.cage\_enhancers/List/genome=rn6/species=Rattus%20norvegicus

Main Experiments Cells TF & cofactors Downloads TSS Enhancers Statistics Login

Species: Rattus norvegicus Chromosome: Start: End: Submit

### Enhancers: List

Other columns: Select...

| #  | ID     | Species           | Chromosome | Start   | End     | Name              | Source  |
|----|--------|-------------------|------------|---------|---------|-------------------|---------|
| 1  | 117511 | Rattus norvegicus | chr1       | 1180827 | 1181038 | 1:1180827-1181038 | SOL     |
| 2  | 119357 | Rattus norvegicus | chr1       | 1180827 | 1181038 | 1:1180827-1181038 | SOL+EDL |
| 3  | 116199 | Rattus norvegicus | chr1       | 1783974 | 1784076 | 1:1783974-1784076 | EDL     |
| 4  | 119358 | Rattus norvegicus | chr1       | 1783974 | 1784076 | 1:1783974-1784076 | SOL+EDL |
| 5  | 117512 | Rattus norvegicus | chr1       | 1783976 | 1784076 | 1:1783976-1784076 | SOL     |
| 6  | 117513 | Rattus norvegicus | chr1       | 1870374 | 1870697 | 1:1870374-1870697 | SOL     |
| 7  | 119359 | Rattus norvegicus | chr1       | 1870374 | 1870697 | 1:1870374-1870697 | SOL+EDL |
| 8  | 116200 | Rattus norvegicus | chr1       | 6453490 | 6453776 | 1:6453490-6453776 | EDL     |
| 9  | 119360 | Rattus norvegicus | chr1       | 6453490 | 6453776 | 1:6453490-6453776 | SOL+EDL |
| 10 | 116201 | Rattus norvegicus | chr1       | 7726222 | 7726518 | 1:7726222-7726518 | EDL     |

Previous 1 2 3 4 5 ... 526 Next 10 entries Showing 1 to 10 of 5,255 entries

Back

Figure SD4. List of revealed rat enhancers in GTRD database.

## Differentially expressed peaks

We calculated the differentially expressed peaks in two ways: for each experiment phase separately, in comparison with control samples (phase-control peak signatures), and in time course manner comparing the first day of disuse with control samples and each other phase of experiment with the previous phase (time course peak signatures) [35]. Differentially expressed peaks were

annotated with Ensembl gene coordinates and statistics of affected genes ('gene-centered' differentially expressed peaks - gene signatures, DEGs) were calculated.

We counted a gene as differentially expressed if any of its TSS was differentially expressed

A DPI peak was annotated as gene TSS if its center expanded by 200nt intersected the genomic interval of the said gene.

|                     | EDL  |      | Sol                 |                     |
|---------------------|------|------|---------------------|---------------------|
|                     | UP   | DOWN | UP                  | DOWN                |
| D1vC                | 1443 | 774  | 1035                | 1423                |
| D3vD1               | 825  | 1886 | 560                 | 373                 |
| D7vD3               | 251  | 45   | 136                 | 143                 |
| <b><i>R1vD7</i></b> | 22   | 150  | <b><i>19077</i></b> | <b><i>9198</i></b>  |
| <b><i>R3vR1</i></b> | 32   | 22   | <b><i>3603</i></b>  | <b><i>11921</i></b> |
| R7vR3               | 0    | 42   | 34                  | 47                  |

Table SD4. Differentially expressed peaks, time course (FDR BH < 0.05, |LFC| > 1.25)

|      | EDL |      | Sol |      |
|------|-----|------|-----|------|
|      | UP  | DOWN | UP  | DOWN |
| D1vC | 212 | 145  | 204 | 238  |

|                     |     |     |                    |                    |
|---------------------|-----|-----|--------------------|--------------------|
| D3vD1               | 162 | 253 | 126                | 78                 |
| D7vD3               | 54  | 11  | 20                 | 43                 |
| <b><i>R1vD7</i></b> | 8   | 35  | <b><i>2847</i></b> | <b><i>934</i></b>  |
| <b><i>R3vR1</i></b> | 6   | 6   | <b><i>486</i></b>  | <b><i>1490</i></b> |
| R7vR3               | 0   | 13  | 12                 | 9                  |

Table SD5. Differentially expressed peaks, time course gene centric (FDR BH < 0.05, |LFC| >1.25)

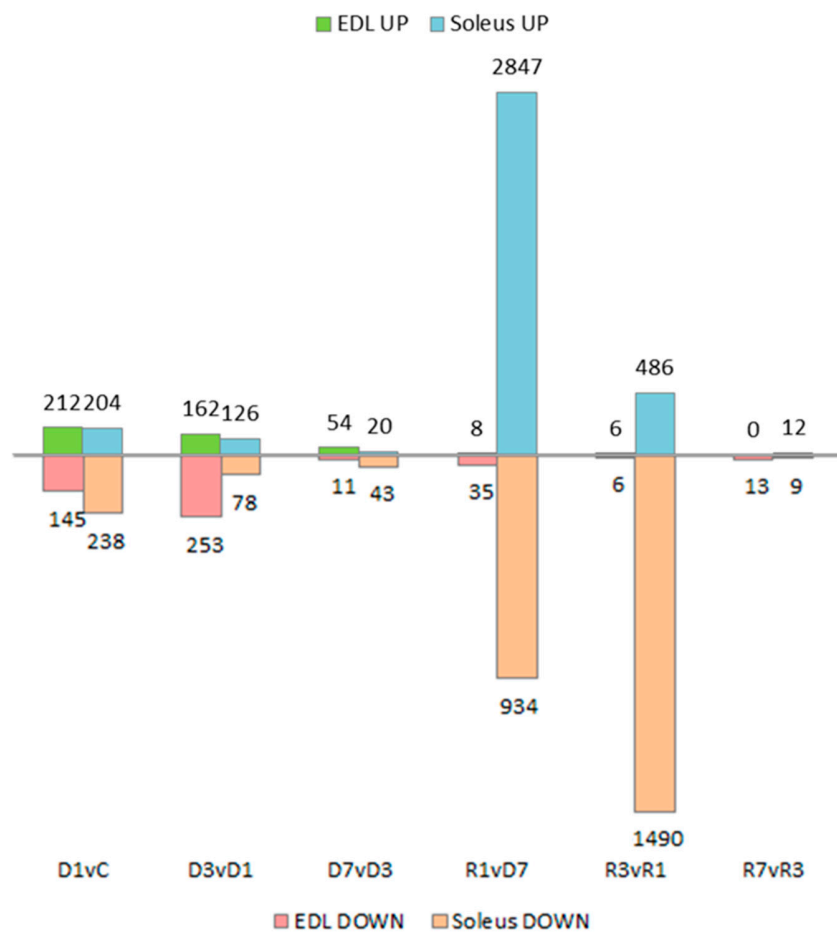

Fig SD5. DEGs in soleus and EDL muscles, time course

|    | extensor digitorum longus (EDL) |             | soleus (Sol) |             |
|----|---------------------------------|-------------|--------------|-------------|
|    | <i>UP</i>                       | <i>DOWN</i> | <i>UP</i>    | <i>DOWN</i> |
| D1 | 1444                            | 775         | 1036         | 1424        |
| D3 | 1746                            | 1582        | 594          | 590         |

|                  |      |      |                     |                     |
|------------------|------|------|---------------------|---------------------|
| D7               | 1081 | 732  | 525                 | 754                 |
| <b><i>R1</i></b> | 73   | 180  | <b><i>18259</i></b> | <b><i>11689</i></b> |
| R3               | 517  | 1270 | 2344                | 1916                |
| R7               | 22   | 30   | 1969                | 734                 |

Table SD6. Differentially expressed peaks, compared to control samples (FDR BH < 0.05, |LFC| >1.25)

|                  | extensor digitorum longus (EDL) |             | soleus (Sol)       |                   |
|------------------|---------------------------------|-------------|--------------------|-------------------|
|                  | <i>UP</i>                       | <i>DOWN</i> | <i>UP</i>          | <i>DOWN</i>       |
| D1               | 212                             | 145         | 204                | 238               |
| D3               | 282                             | 241         | 138                | 80                |
| D7               | 153                             | 92          | 101                | 105               |
| <b><i>R1</i></b> | 26                              | 10          | <b><i>2625</i></b> | <b><i>967</i></b> |
| R3               | 159                             | 22          | 572                | 134               |
| R7               | 8                               | 7           | 349                | 117               |

Table SD7. Differentially expressed peaks - gene centric, compared to control samples (FDR BH  $< 0.05$ ,  $|LFC| > 1.25$ )

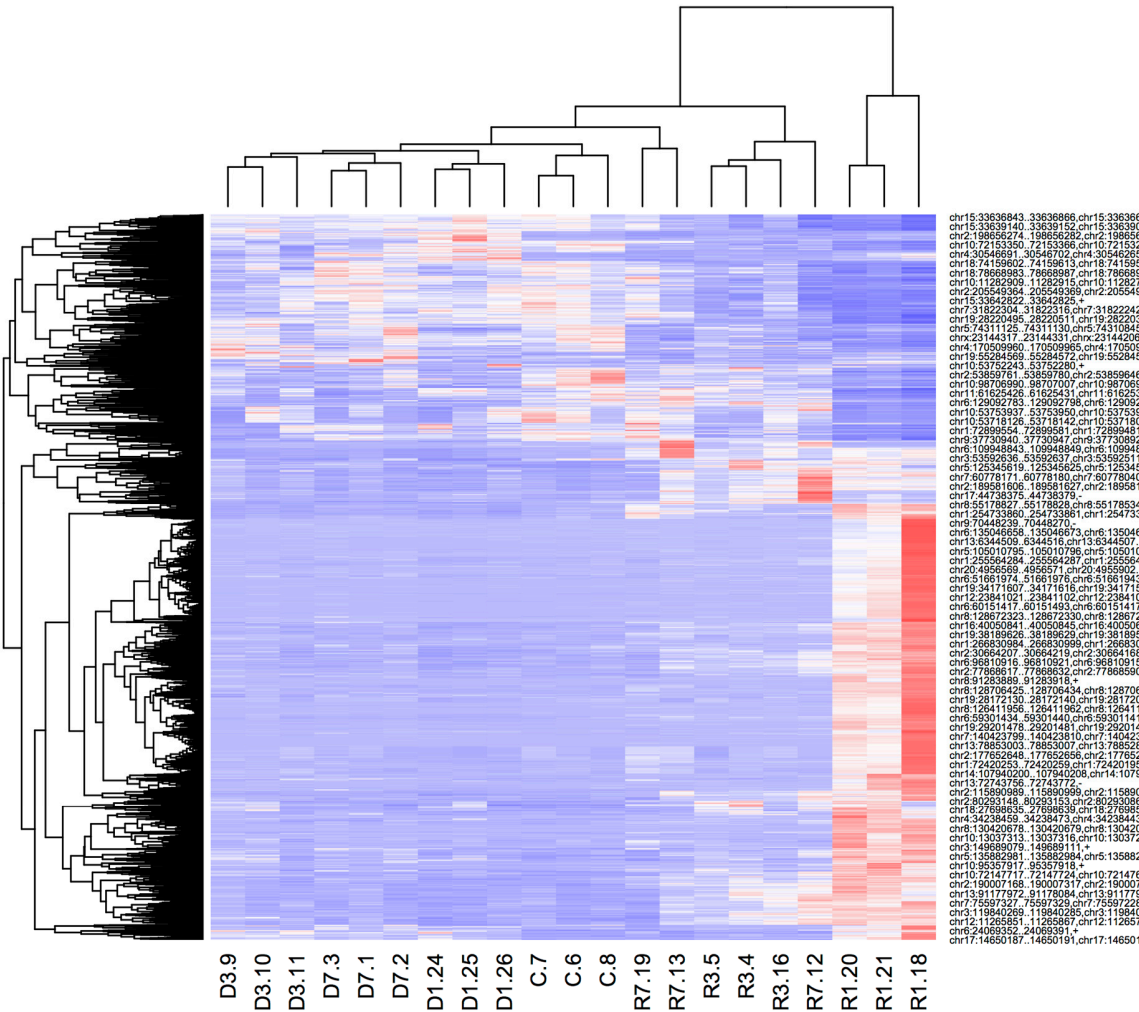

Fig SD6. Differentially expressed peaks (time course) as classifier signatures. FDR threshold 5e-

EDL

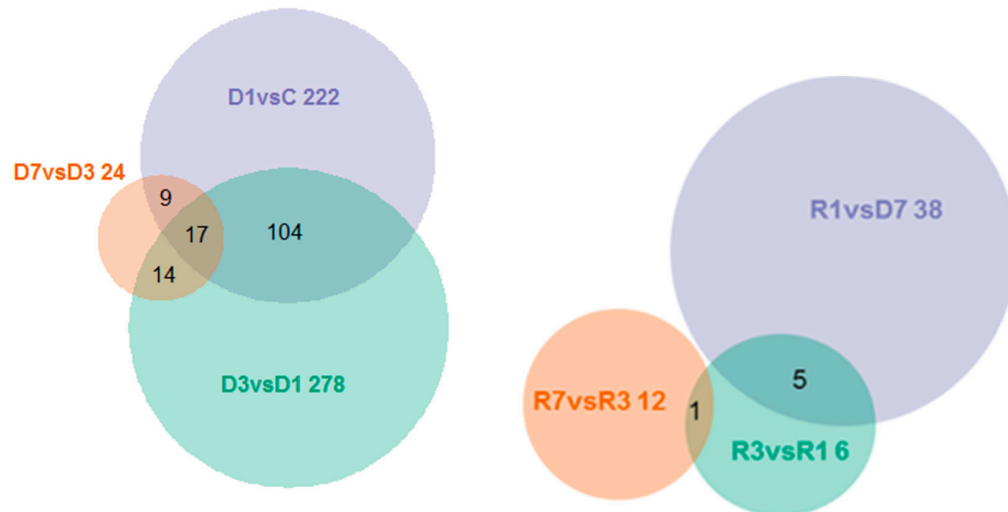

Soleus

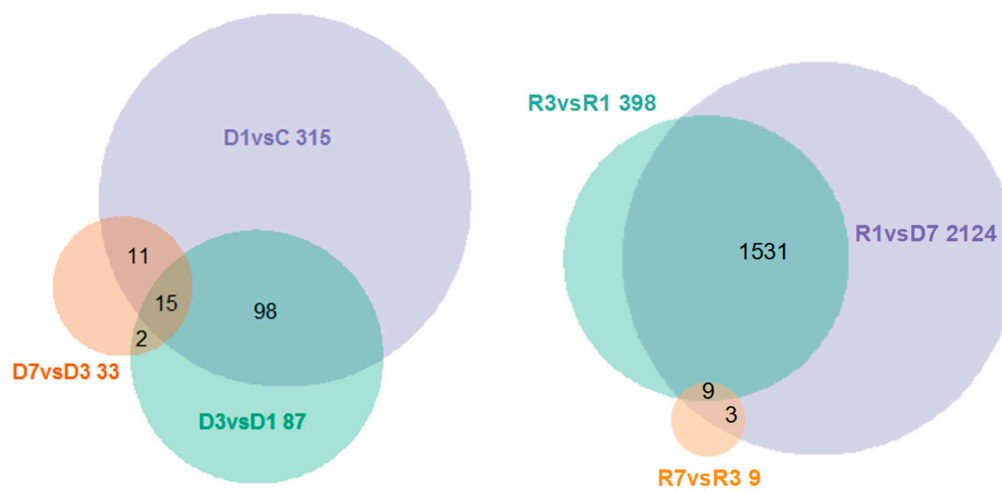

Fig. SD7. Most of the differentially expressed peaks were common to both phase-control and time course comparisons

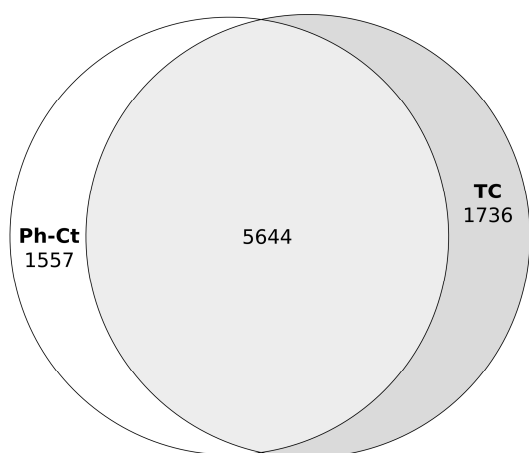

Fig SD8. Common and unique differentially expressed peaks between phase-control (**Ph-Ct**) and time course (**TC**) comparisons. Soleus muscle. FDR threshold 5e-04

| Parent                          | Term                              | D1   | D3 | D7   | R1   | R3   | R7   |
|---------------------------------|-----------------------------------|------|----|------|------|------|------|
| actin cytoskeleton organization | DNA packaging                     |      |    | 3.76 |      | 5.49 | 4.53 |
|                                 | chromatin assembly or disassembly |      |    | 3.95 |      | 5.90 | 6.89 |
|                                 | mitochondrion organization        | 2.70 |    |      | 5.96 |      |      |



|                                               |                                                       |      |      |      |       |      |      |
|-----------------------------------------------|-------------------------------------------------------|------|------|------|-------|------|------|
|                                               | cellular component organization                       | 2.71 |      | 2.66 | 5.41  | 6.67 | 7.84 |
|                                               | actin cytoskeleton organization                       | 4.02 | 3.59 | 2.89 | 11.61 | 4.05 | 3.38 |
|                                               | collagen fibril organization                          |      |      |      |       |      | 5.57 |
|                                               | macromolecular complex subunit organization           |      | 2.05 |      | 3.17  | 7.61 | 4.37 |
|                                               | chromosome organization                               |      |      | 2.55 |       | 5.39 | 4.51 |
|                                               | protein-DNA complex subunit organization              |      |      | 2.69 |       | 5.75 | 4.25 |
|                                               | supramolecular fiber organization                     | 4.82 |      | 4.64 | 9.47  | 5.25 | 6.67 |
|                                               | actin filament-based process                          | 3.90 | 3.52 | 2.82 | 11.32 | 4.36 | 3.26 |
| muscle cell differentiation                   | muscle system process                                 |      |      | 2.81 | 7.59  | 2.47 |      |
|                                               | muscle contraction                                    |      |      | 2.84 | 7.69  | 2.49 |      |
|                                               | cellular component assembly involved in morphogenesis |      |      | 2.09 | 5.64  | 5.82 |      |
|                                               | cardiac muscle cell differentiation                   |      |      |      | 3.63  | 7.71 | 2.90 |
|                                               | muscle tissue development                             | 2.43 |      |      | 2.62  | 5.82 | 2.09 |
|                                               | muscle structure development                          | 2.50 |      |      | 6.79  | 5.71 | 2.81 |
| cellular component organization or biogenesis | cellular component organization or biogenesis         | 2.56 |      | 2.69 | 6.44  | 7.08 | 7.87 |
| cellular process                              | cellular process                                      |      |      |      | 7.29  | 3.70 | 3.12 |
| energy derivation by oxidation of             | purine ribonucleotide metabolic                       | 2.62 |      |      | 10.34 |      |      |

|                                                |                                                     |      |      |       |       |      |      |
|------------------------------------------------|-----------------------------------------------------|------|------|-------|-------|------|------|
| organic compounds                              | process                                             |      |      |       |       |      |      |
|                                                | energy derivation by oxidation of organic compounds |      |      |       | 13.60 |      |      |
|                                                | organophosphate metabolic process                   | 3.44 |      |       | 7.80  |      | 3.65 |
|                                                | small molecule metabolic process                    |      |      |       | 7.21  |      | 3.11 |
|                                                | enzyme linked receptor protein signaling pathway    |      |      |       | 5.51  |      |      |
|                                                | G-protein coupled receptor signaling pathway        | 2.66 |      |       | 6.03  | 2.56 |      |
|                                                | oxidation-reduction process                         |      |      |       | 13.05 |      | 2.31 |
| protein folding                                | protein folding                                     |      |      |       | 5.81  |      |      |
| mitochondrion organization                     | mitochondrion organization                          |      |      |       | 5.96  |      |      |
| generation of precursor metabolites and energy | generation of precursor metabolites and energy      |      |      |       | 13.74 |      |      |
|                                                | phosphorus metabolic process                        |      |      |       | 5.48  |      | 2.29 |
| hydrogen ion transmembrane transport           | hydrogen ion transmembrane transport                |      |      |       | 9.41  |      |      |
| T cell mediated immunity                       | immune effector process                             |      |      | 6.45  | 2.04  |      |      |
|                                                | T cell mediated immunity                            | 5.58 | 5.50 | 10.99 | 2.92  | 2.73 | 3.74 |

Table SD8. Enriched GO terms of DEGs in soleus muscle. Up-regulated signatures are shown in red, down-regulated - in green (see ST7)

| Parent                   | Term                                         | D1 DOWN | D3 DOWN | D7 DOWN | R1 DOWN | R3 DOWN | R7 DOWN |
|--------------------------|----------------------------------------------|---------|---------|---------|---------|---------|---------|
| ATP metabolism           | ATP metabolic process                        |         | 4.66574 |         |         |         |         |
|                          | purine-containing compound metabolic process |         | 2.17223 |         |         |         |         |
| T cell mediated immunity | T cell mediated immunity                     | 5.13377 |         |         |         |         |         |

Table SD9. Enriched GO terms of DEGs, downregulated in EDL muscle

|                                 |                                         | D1 UP | D3 UP   | D7 UP | R1 UP   | R3 UP | R7 UP |
|---------------------------------|-----------------------------------------|-------|---------|-------|---------|-------|-------|
| actin cytoskeleton organization | actin cytoskeleton organization         |       | 5.73436 |       |         |       |       |
|                                 | supramolecular fiber organization       |       | 5.15773 |       |         |       |       |
|                                 | actin filament-based process            |       | 6.31542 |       |         |       |       |
| muscle structure development    | cellular component assembly involved in |       | 3.50093 |       | 2.05336 |       |       |

|                                     |                                        |  |         |         |         |         |  |
|-------------------------------------|----------------------------------------|--|---------|---------|---------|---------|--|
|                                     | morphogenesis                          |  |         |         |         |         |  |
|                                     | cellular<br>component<br>morphogenesis |  | 2.50959 |         |         |         |  |
|                                     | muscle structure<br>development        |  | 6.12048 |         |         |         |  |
|                                     | muscle tissue<br>development           |  | 2.26282 |         |         |         |  |
|                                     | striated muscle<br>cell development    |  | 5.54289 |         |         |         |  |
|                                     | muscle<br>contraction                  |  | 5.66158 | 4.24029 | 3.38392 |         |  |
|                                     | muscle system<br>process               |  | 5.57556 | 4.17898 | 3.34631 |         |  |
| <b>T cell mediated<br/>immunity</b> | leukocyte<br>migration                 |  |         |         |         | 2.35439 |  |

Table SD10. Enriched GO terms of DEGs, upregulated in EDL muscle. (See ST7)

Gene terms enrichment:

We also found that 34 genes related to both skeletal muscle cell differentiation and positive regulation of transcription by RNA polymerase II had robust DPI peaks significantly upregulated

in disuse phases (See ST11). In the fast muscle most changes happened on the third day of disuse (phase D3) and also included actin cytoskeleton (sarcomere) reorganisation. Nevertheless, ATP metabolism was down-regulated in D3, regardless of the muscle structure development in D3, D7 and R1. T-cell immunity features were down-regulated in D1 but already up-regulated in R3.

We also conducted analogous GSEA for DEGs which were unique in each phase (D1-3-7 and R1-3-7). The number of corresponding DEGs is presented on venn diagrams in Fig.N above (see the list of unique DEGs on each phase and PANTHER results in SM). The analysis was performed using PANTHER GO-Slim Biological Process as an annotation data set via Fisher's test considering the Bonferroni correction for multiple testing. As in the case of general DEGs in each phase, we do observe significant differences in GSEs for unique differentially expressed genes between fast and slow muscles. The regulation of adaptive immune response and related T cell immunity were only enriched terms in the last disuse phase (day 7) in slow muscle, while the regulation of adaptive immune response and ATP, nucleotides metabolic processes were presented in the enrichment set at days 1 and 3 of the disuse in fast muscles, correspondingly. GSEs of the unique DEGs for recovery are distinct between EDL and Sol too. However, the analysis identified that myofibril assembly and muscle contraction are enriched terms in EDL and specific for R1 phase only, whereas no statistically significant terms for unique EDL's differentially expressed genes were revealed in other recovery phases. Interestingly, gene set enrichments in soleus muscle are much widely represented in each recovery phase and demonstrate consistent functional pattern during recovery in this type of the skeletal muscle: involvement of signaling (via G-protein-coupled receptor and phosphorylation cascades of intermediate and target proteins) and metabolic processes (cellular respiration, nucleotides biosynthesis, actin filament organization) in early phase

R1, follow-up activation of translational complex machinery in R3 and cell development and differentiation in R7 phase.

We performed functional analysis on differentially expressed muscle specific peaks which were upstream of a DEG by extrapolating data on functional annotation of those DEGs

In recovery phase the most dispensable of representative biological process ontologies of upregulated muscle specific differentially expressed peaks involved muscle system process and cell differentiation signatures:

| term ID                    | description                                            | frequency | log10 p-value | uniqueness | dispensability |
|----------------------------|--------------------------------------------------------|-----------|---------------|------------|----------------|
| <a href="#">GO:0003012</a> | muscle system<br>process                               | 1.799 %   | -8.391        | 0.96       | 0              |
| <a href="#">GO:0019058</a> | viral life cycle                                       | 0.864 %   | -20.793       | 0.97       | 0              |
| <a href="#">GO:0070972</a> | protein<br>localization to<br>endoplasmic<br>reticulum | 0.218 %   | -20.2685      | 0.94       | 0              |
| <a href="#">GO:0042026</a> | protein refolding                                      | 0.088 %   | -5.8876       | 0.98       | 0              |
| <a href="#">GO:0016071</a> | mRNA metabolic<br>process                              | 2.522 %   | -18.2609      | 0.86       | 0              |
| <a href="#">GO:0006457</a> | protein folding                                        | 0.935 %   | -10.5739      | 0.99       | 0              |

|                            |                                                   |         |          |      |      |
|----------------------------|---------------------------------------------------|---------|----------|------|------|
| <a href="#">GO:0045597</a> | positive<br>regulation of cell<br>differentiation | 4.656 % | -13.8857 | 0.72 | 0.01 |
|----------------------------|---------------------------------------------------|---------|----------|------|------|

Table SD11. Representative GO BP terms of DEGs downstream to permissive peaks of soleus muscle upregulated in R1, unique to experiment (REVIGO dispensability value less than 0.05, FDR less than 0.0005). See ST12 for full list of representative terms.

In the same recovery phase, the most dispensable of representative biological process ontologies of genes, associated with down-regulated peaks, which were unique to the experiment, involved muscle system process, metabolism and, interestingly, second-messenger signalling

| term ID                    | description                                    | frequency | log10 p-value | uniqueness | dispensability |
|----------------------------|------------------------------------------------|-----------|---------------|------------|----------------|
| <a href="#">GO:0003012</a> | muscle system<br>process                       | 1.799 %   | -27.2706      | 0.93       | 0              |
| <a href="#">GO:0022904</a> | respiratory<br>electron transport<br>chain     | 0.435 %   | -31.1881      | 0.68       | 0              |
| <a href="#">GO:1902600</a> | hydrogen ion<br>transmembrane<br>transport     | 0.641 %   | -11.0666      | 0.78       | 0.01           |
| <a href="#">GO:0019932</a> | second-<br>messenger-<br>mediated<br>signaling | 1.070 %   | -4.5735       | 0.94       | 0.02           |

Table SD12. Representative GO BP terms of downregulated peaks, unique to experiment (REVIGO dispensability value less than 0.05, FDR less than 0.0005). See ST13 for full list of representative terms.

In EDL, muscle specific differentially expressed peaks were mostly related to muscle system process, AMP metabolism, protein signalling, and regulation of immune response along all phases of experiment.

| term ID                    | description                                           | frequency | log10 p-value | uniqueness | dispensability |
|----------------------------|-------------------------------------------------------|-----------|---------------|------------|----------------|
| <a href="#">GO:0003012</a> | muscle system process                                 | 1.799 %   | -21.1862      | 0.91       | 0              |
| <a href="#">GO:0009167</a> | purine ribonucleoside monophosphate metabolic process | 1.382 %   | -14.1246      | 0.43       | 0              |
| <a href="#">GO:0007167</a> | enzyme linked receptor protein signaling pathway      | 3.968 %   | -4.3663       | 0.92       | 0.02           |
| <a href="#">GO:0002697</a> | regulation of immune effector process                 | 1.323 %   | -3.9525       | 0.95       | 0.05           |



| <a href="#">PANTHER GO-Slim Biological Process</a>              | Reference           | Experiment         | <a href="#">expected</a> | <a href="#">Fold</a><br><a href="#">Enrichment</a> | <a href="#">P value</a> |
|-----------------------------------------------------------------|---------------------|--------------------|--------------------------|----------------------------------------------------|-------------------------|
| <a href="#">nucleosome organization</a>                         | <a href="#">50</a>  | <a href="#">8</a>  | 0.89                     | 8.96                                               | 1.27E-02                |
| <a href="#">chromatin organization</a>                          | <a href="#">250</a> | <a href="#">17</a> | 4.46                     | 3.81                                               | 9.34E-03                |
| <a href="#">chromosome organization</a>                         | <a href="#">379</a> | <a href="#">20</a> | 6.77                     | 2.96                                               | 4.92E-02                |
| <a href="#">protein-DNA complex subunit organization</a>        | <a href="#">106</a> | <a href="#">11</a> | 1.89                     | 5.81                                               | 1.18E-02                |
| <a href="#">protein-containing complex subunit organization</a> | <a href="#">543</a> | <a href="#">27</a> | 9.69                     | 2.79                                               | 5.77E-03                |
| <a href="#">actin cytoskeleton organization</a>                 | <a href="#">240</a> | <a href="#">16</a> | 4.28                     | 3.73                                               | 2.22E-02                |
| <a href="#">actin filament-based process</a>                    | <a href="#">248</a> | <a href="#">16</a> | 4.43                     | 3.61                                               | 3.24E-02                |
| <a href="#">cellular component biogenesis</a>                   | <a href="#">969</a> | <a href="#">37</a> | 17.3                     | 2.14                                               | 3.66E-02                |

Table SD13. Significantly enriched features in DEGs, having a robust non-genic signature upstream TSS peak (See ST9). Bonferroni corrected P value was cut off at  $P < 0.05$ .

## Enhancers

|       | EDL |      | Sol |      |
|-------|-----|------|-----|------|
|       | UP  | DOWN | UP  | DOWN |
| D1    | 15  | 8    | 12  | 29   |
| D3    | 15  | 28   | 5   | 4    |
| D7    | 9   | 7    | 6   | 11   |
| R1    | 0   | 1    | 407 | 121  |
| R3    | 7   | 3    | 19  | 11   |
| R7    | 0   | 0    | 21  | 6    |
| Total | 33  | 40   | 437 | 146  |

Table SD14. Differentially expressed enhancers in soleus and EDL muscle

In Soleus at R1 phase differentially expressed enhancers formed clear clusters, unlike the other phases

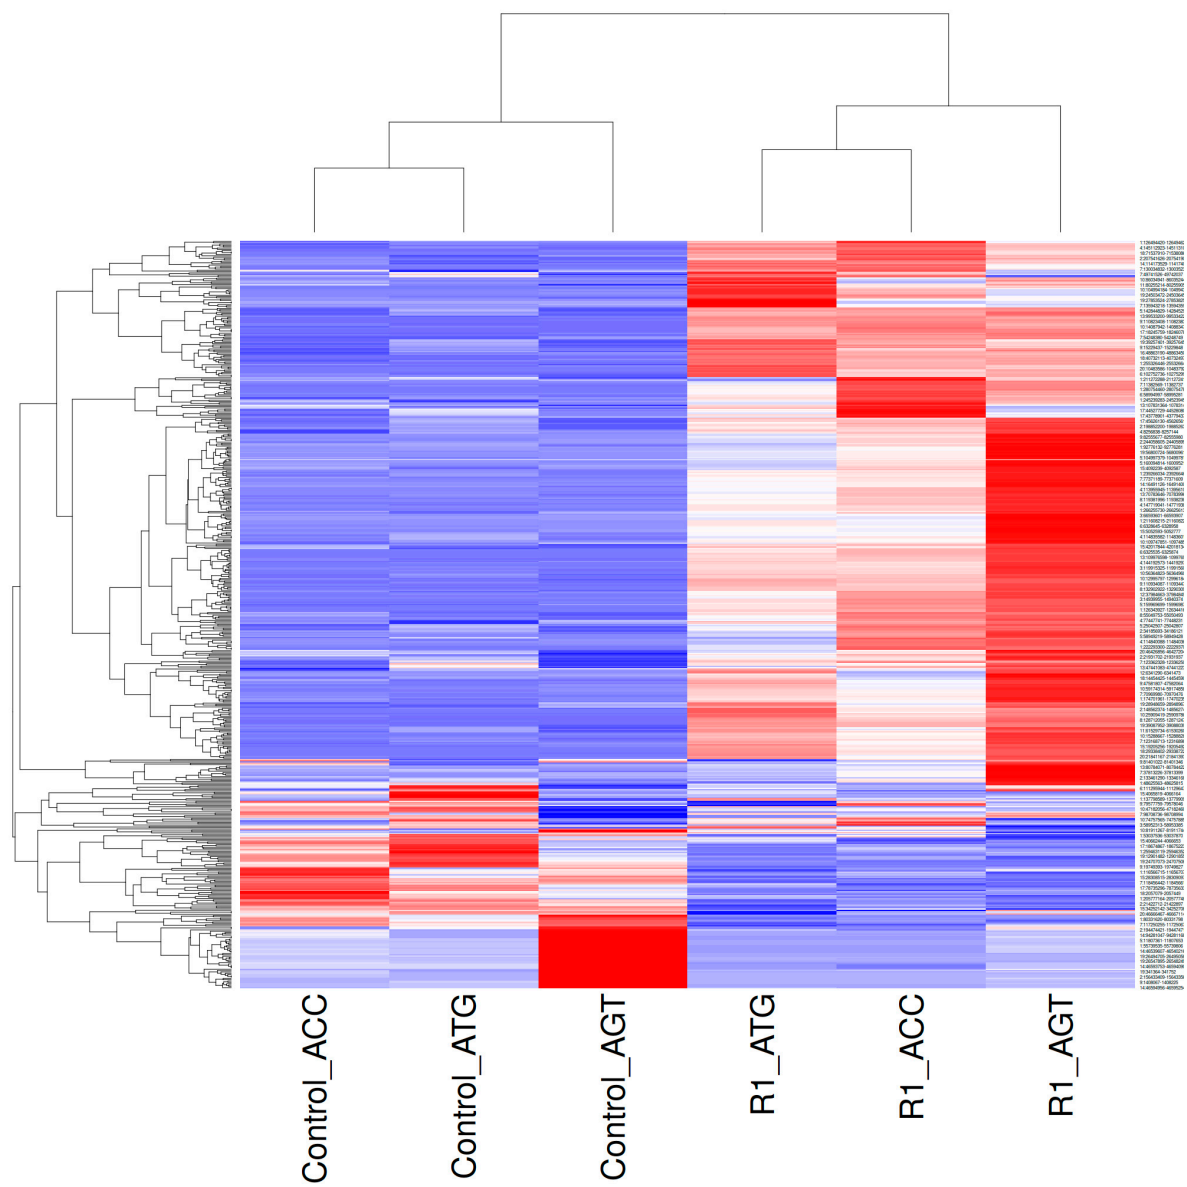

Fig. SD9. Heatmap of differential expression of enhancers in the Soleus muscle on the first day of recovery (R1 phase)

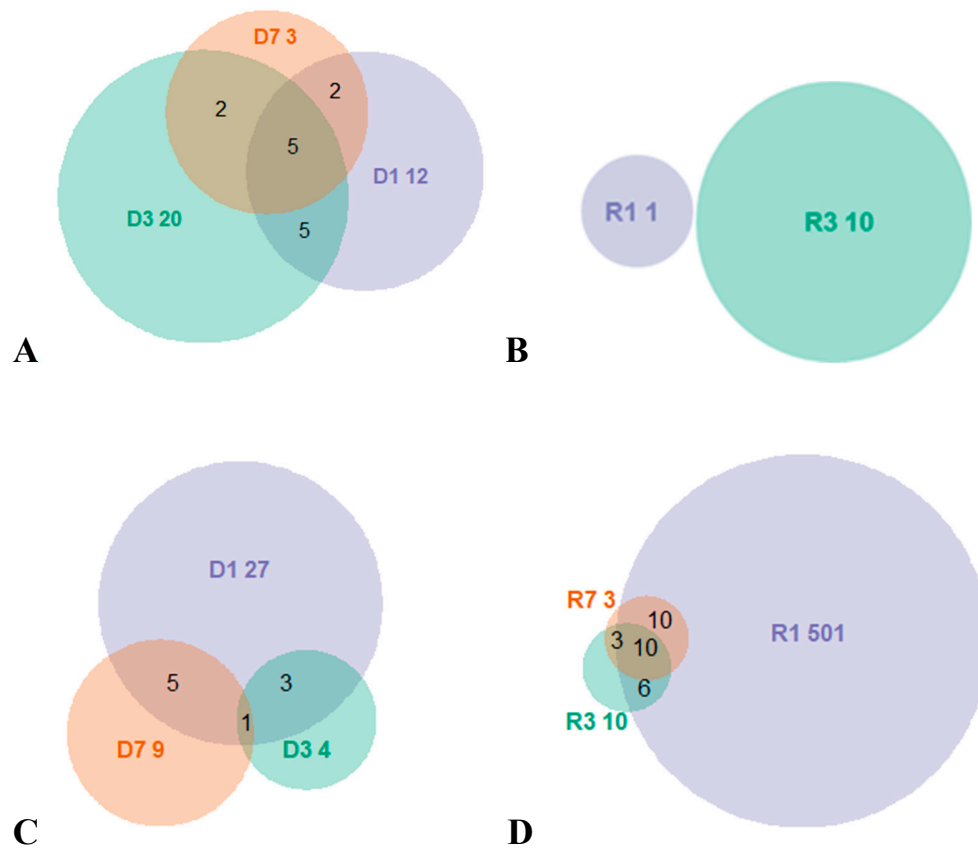

Fig. SD10. Venn diagrams for differentially expressed enhancers. **A**. Differentially expressed enhancers on days 1, 3 and 7 of disuse in the EDL muscle (shown as D1, D3, D7 respectively). **B**. Differentially expressed enhancers on days 1, 3 and 7 of recovery in the EDL muscle (shown as R1, R3, R7 respectively). **C**. Differentially expressed enhancers on days 1, 3 and 7 of disuse in the soleus muscle (shown as D1, D3, D7 respectively). **D**. Differentially expressed enhancers on days 1, 3 and 7 of recovery in the soleus muscle (shown as R1, R3, R7 respectively).

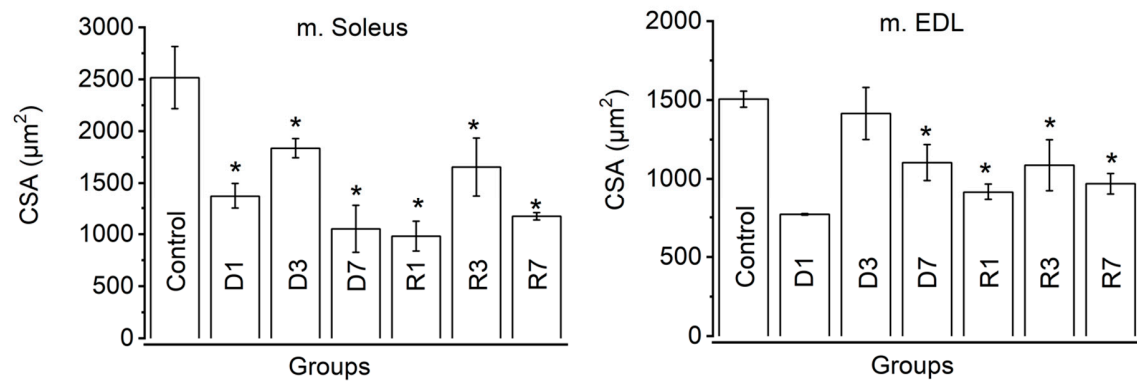

Fig. SD11 Cross-sectional area values in control and time-point groups in slow and fast muscle.
